# Supplementary material for: 3D Superparamagnetic Scaffolds for Bone Mineralization under Static Magnetic Field Stimulation
Source: MDPI journal article supplement (doi:10.3390/ma12172834), 2019-09-03
Supplement: s1 [file s1]

# 3D Superparamagnetic Scaffolds for Bone Mineralization under Static Magnetic Field Stimulation

Irina Alexandra Paun <sup>1,2,\*</sup>, Bogdan Stefanita Calin <sup>1,2</sup>, Cosmin Catalin Mustaciosu <sup>3</sup>, Mona Mihailescu <sup>2</sup>, Antoniu Moldovan <sup>4</sup>, Ovidiu Crisan <sup>4</sup>, Aurel Leca <sup>4</sup> and Catalin Romeo Luculescu <sup>1</sup>

<sup>1</sup> Center for Advanced Laser Technologies (CETAL), National Institute for Laser, Plasma and Radiation Physics, RO-077125 Magurele-Ilfov, Romania

<sup>2</sup> Physics Department, Faculty of Applied Sciences, University Politehnica of Bucharest, RO-060042 Bucharest, Romania

<sup>3</sup> Horia Hulubei National Institute for Physics and Nuclear Engineering IFIN-HH, RO-077125 Magurele-Ilfov, Romania

<sup>4</sup> National Institute for Laser, Plasma and Radiation Physics, RO-077125 Magurele-Ilfov, Romania

<sup>5</sup> National Institute of Materials Physics, RO-077125 Magurele-Ilfov, Romania

\* Correspondence: irina.paun@inflpr.ro

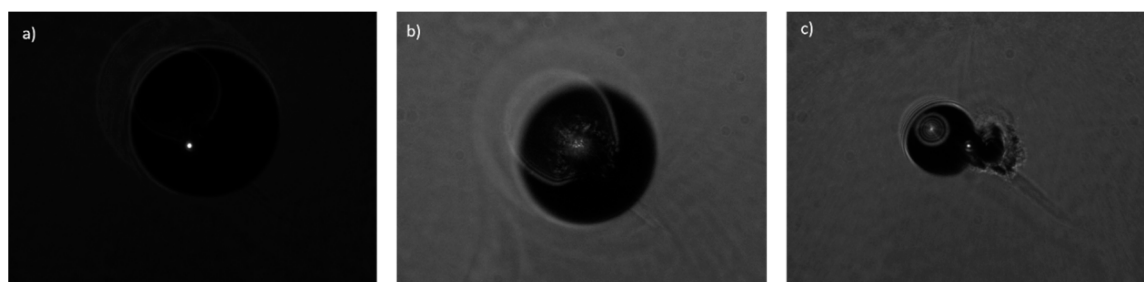

**Figure S1.** Optical images of the laser irradiated material at the laser focus, at different time points during the laser direct writing process: (a) at the beginning of the process, the laser spot is visible on the sample; (b) bubble formation at the irradiation spot, after few seconds of interaction of the focused laser beam with the material; (c) local micro-explosion at the laser-material interaction spot.

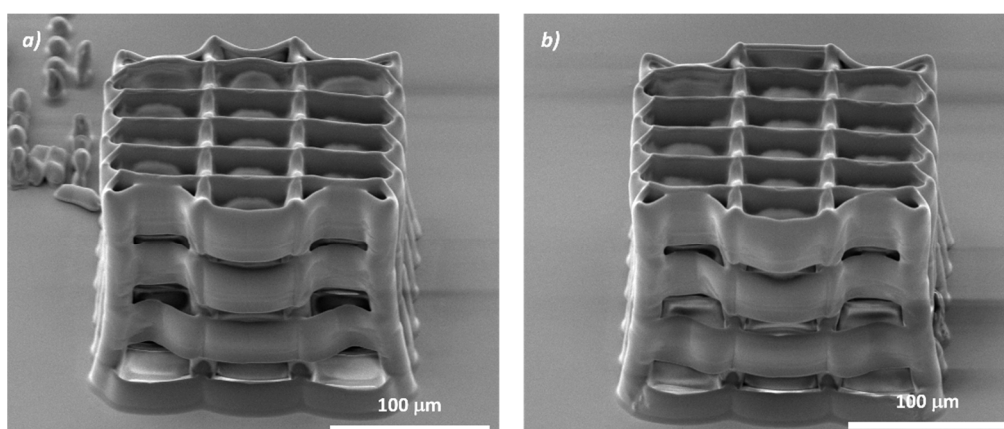

**Figure S2.** SEM micrographs of a scaffold with MNPs concentration of 4 mg/mL: (a) immediately after the fabrication process and (b) after 20 days of exposure to SMF of 1.3 T.

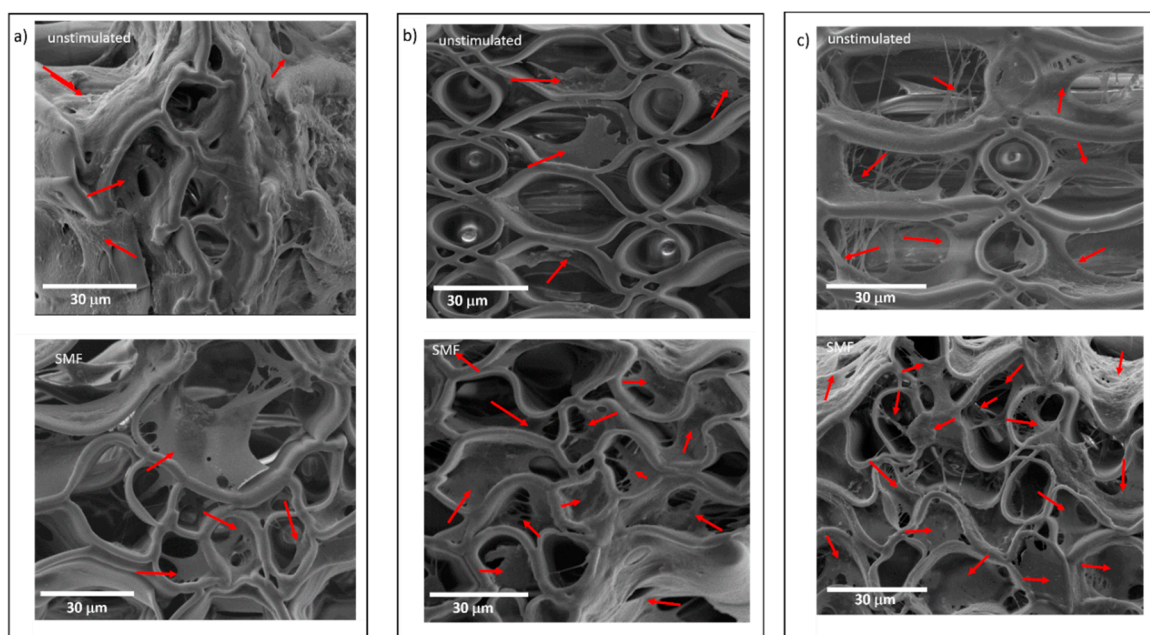

**Figure S3.** SEM micrographs illustrating cells attached on scaffolds with MNPs concentrations of: (a) 0 mg/mL; (b) 2 mg/mL; (c) 4 mg/mL, after 3 days of cultivation, in the absence (upper panel) and in the presence (lower panel) of SMF. The cells are indicated by red arrows.

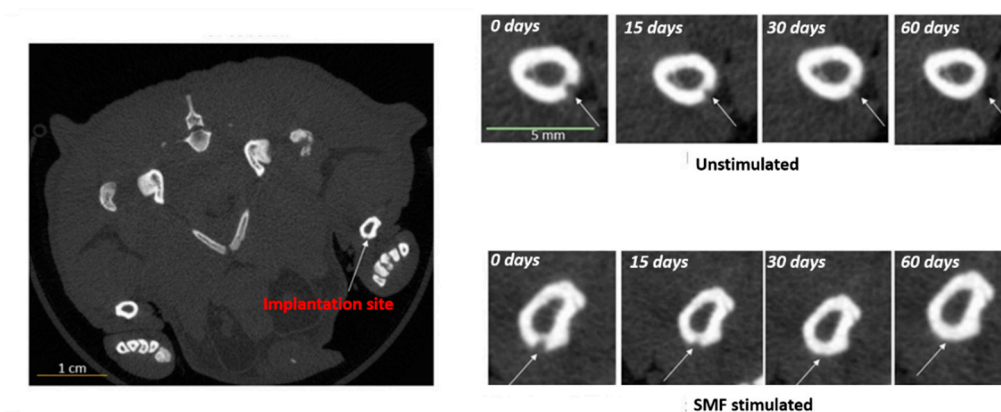

**Figure S4.** Preliminary results in vivo: CT scans of Wistar rats with scaffolds implanted at femoral level, at different time points after the implantation procedure.
